# Supplementary material for: Limonin alleviates high-fat diet-induced dyslipidemia by regulating the intestinal barrier via the microbiota-related ILC3–IL22–IL22R pathway
Source: Royal Society of Chemistry journal article supplement (doi:10.1039/d3fo04530g), 2024-01-01
Supplement: d3fo04530g1.pdf [file d3fo04530g1.pdf]

## **Supplementary Materials**

**Figure S1 Relative weight gain rate and Food intake**

**Figure S2 The structural composition of gut microbiota**

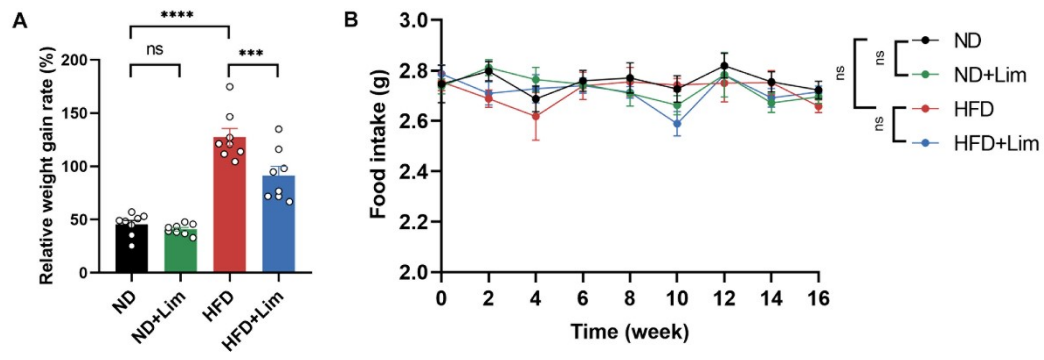

Figure 1 (A) Relative weight gain rate (%) and (B) Food intake during the experiments. All data were expressed as mean  $\pm$  SEM (n=8 for ND and HFD, n=9 for ND+Lim and HFD+Lim). \* $p < 0.05$ ; \*\*  $p < 0.01$ ; \*\*\*  $p < 0.001$ ; \*\*\*\*  $p < 0.0001$ .

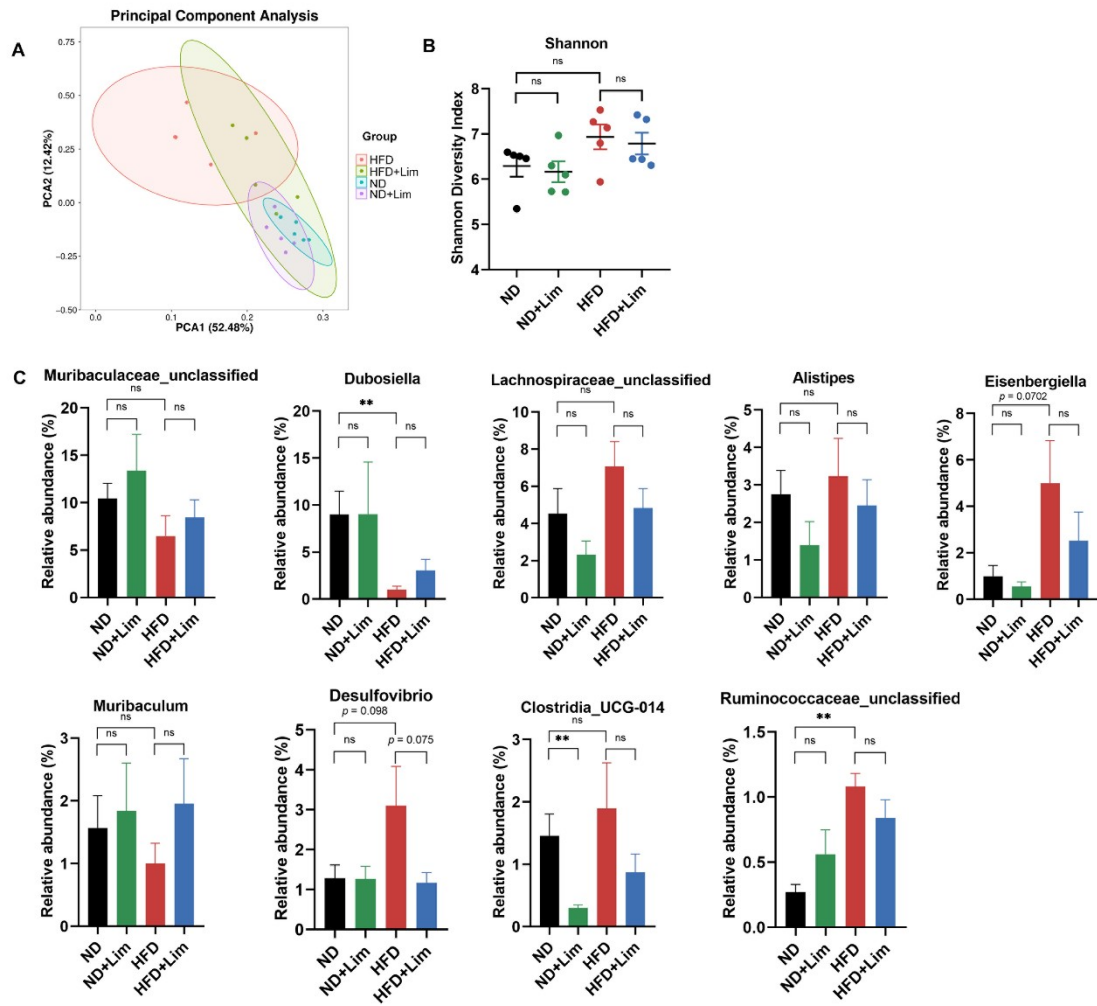

Figure 2 (A) PCA analysis, (B) Shannon diversity index, and (C) the relative abundance of identified differential abundant bacterial groups at Genus levels. All data were expressed as mean  $\pm$  SEM (n=5). \* $p < 0.05$ ; \*\* $p < 0.01$ .
